# Supplementary material for: Monitoring and inhibition of Plk1: amphiphilic porphyrin conjugated Plk1 specific peptides for its imaging and anti-tumor function
Source: Royal Society of Chemistry journal article supplement (doi:10.1039/c4ob00853g), 2014-01-01
Supplement: c4ob00853g1.pdf [file c4ob00853g1.pdf]

# Monitoring and Inhibition of Plk1: Amphiphilic porphyrin conjugated Plk1 specific peptides for its imaging and anti-tumor function

Hongguang Li,<sup>a</sup> Chi-Fai Chan,<sup>a</sup> Wai-Lun Chan,<sup>a</sup> Sam Lear,<sup>b</sup> Kwok-Keung Shiu,<sup>a</sup> Steven L. Cobb,<sup>b</sup> Nai-Ki Mak,<sup>c</sup> Terrence Chi-Kong Lau,<sup>d</sup> Rongfeng Lan,<sup>e\*</sup> Wai-Kwok Wong,<sup>a\*</sup> and Ka-Leung Wong<sup>a\*</sup>

<sup>a</sup> Department of Chemistry, Hong Kong Baptist University, Kowloon Tong, Hong Kong SAR; <sup>b</sup> Department of Chemistry, Durham University, Durham, DH1 3LE, UK; <sup>c</sup> Department of Biology, Hong Kong Baptist University, Kowloon Tong, Hong Kong SAR; <sup>d</sup> Department of Biology and Chemistry, City University of Hong Kong, Kowloon Tong, Hong Kong SAR; <sup>e</sup> Hong Kong Baptist University Institute of Research and Continuing Education, Shenzhen, P. R. China.

## Supporting Information

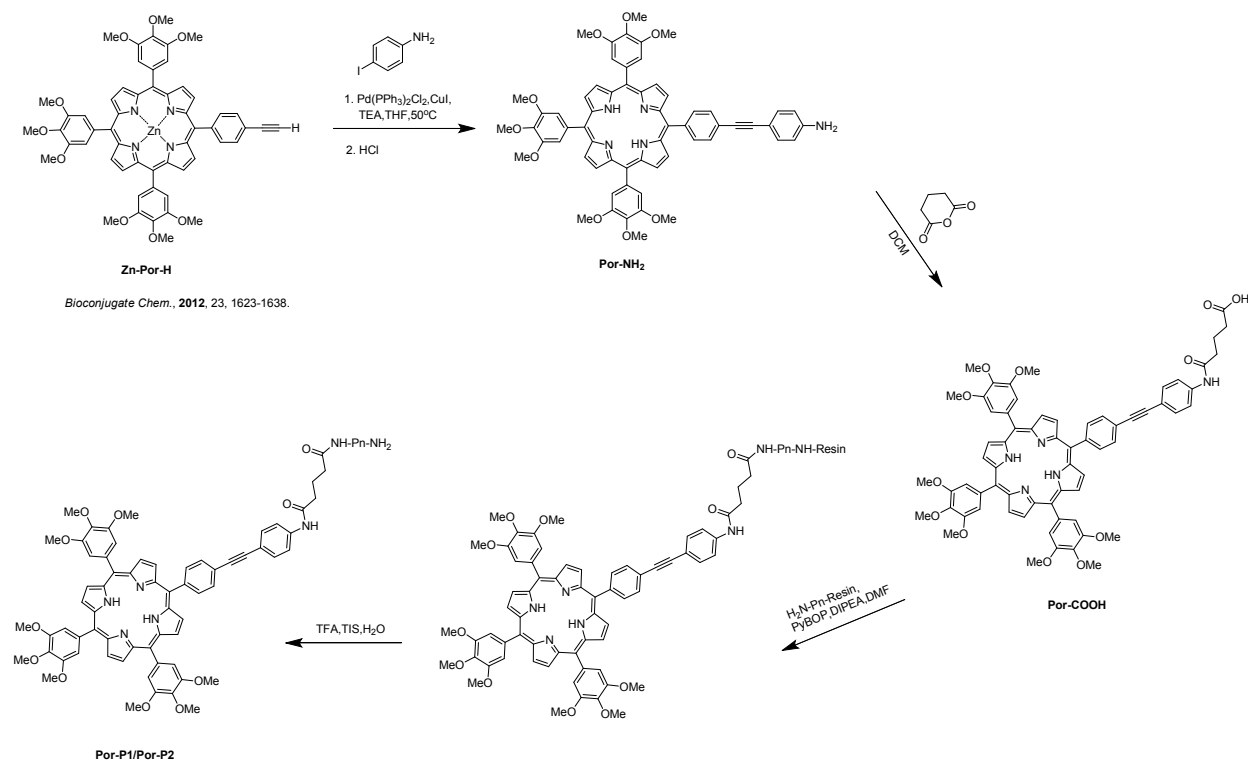

Figure S1. The synthetic scheme for Por-P1 and Por-P2.

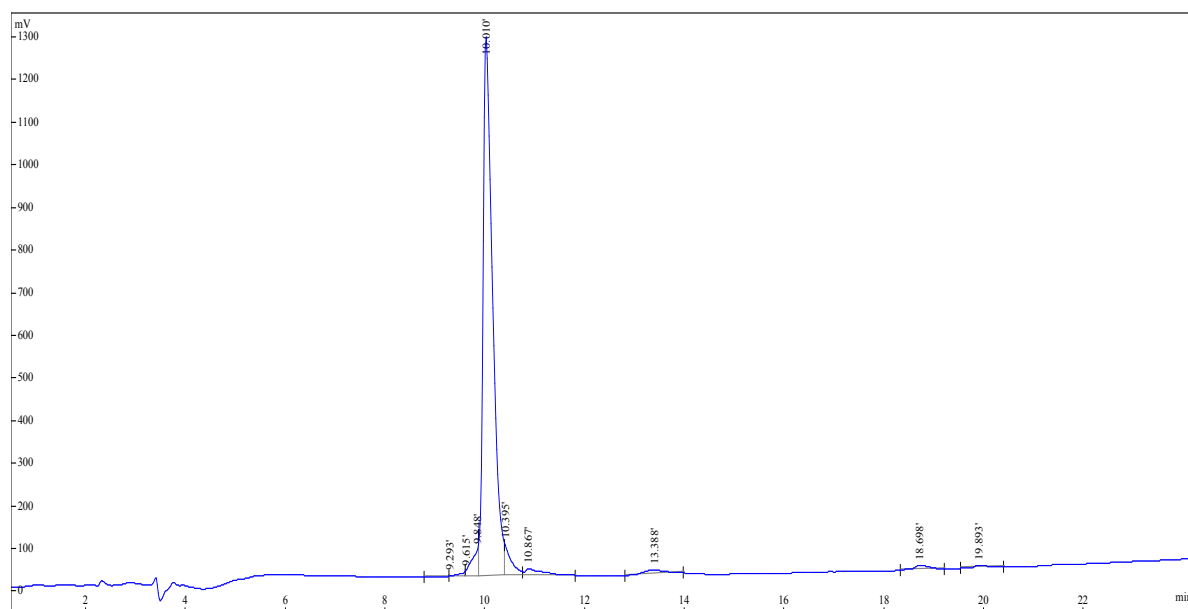

**Figure S2.** HPLC trace of **P1**- condition 10% A (ACN+0.1%TFA) + 90% B (H<sub>2</sub>O+0.1%TFA).

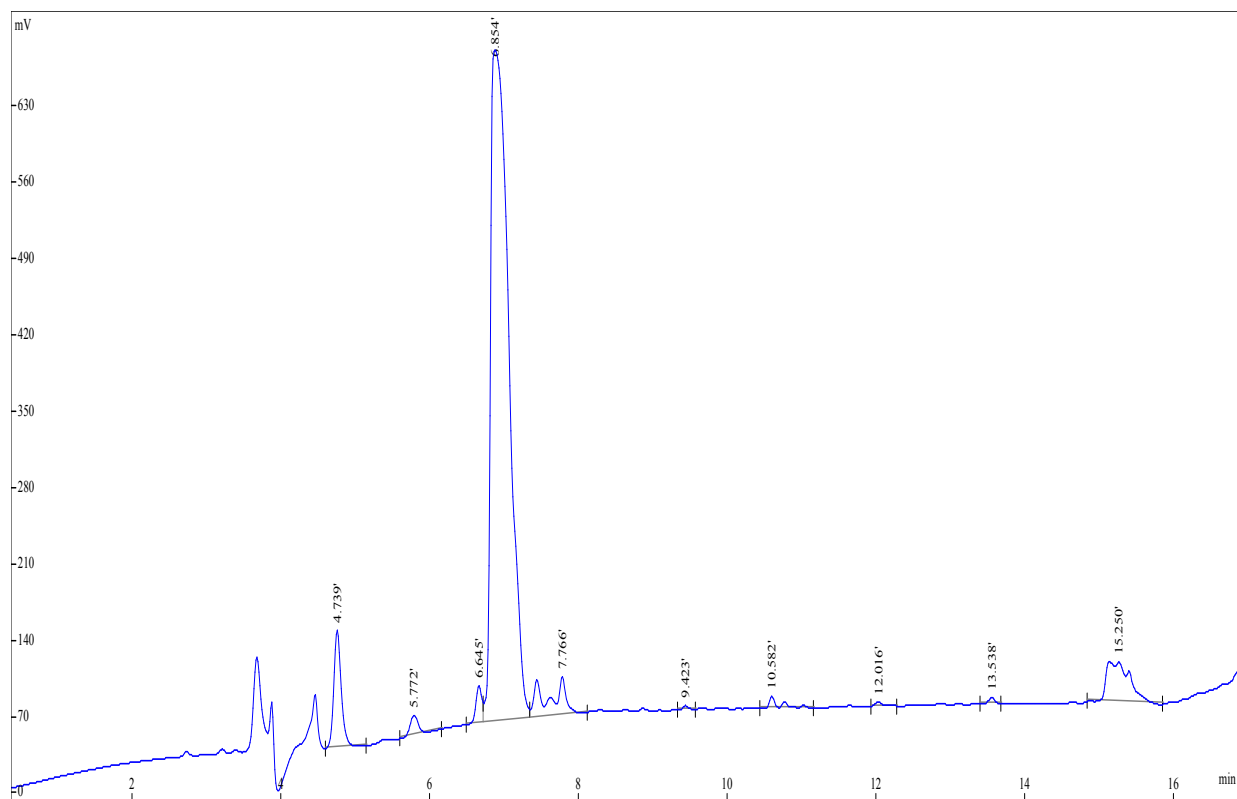

**Figure S3.** HPLC trace of **P2**- condition 10% A (ACN+0.1%TFA) + 90% B (H<sub>2</sub>O+0.1%TFA).

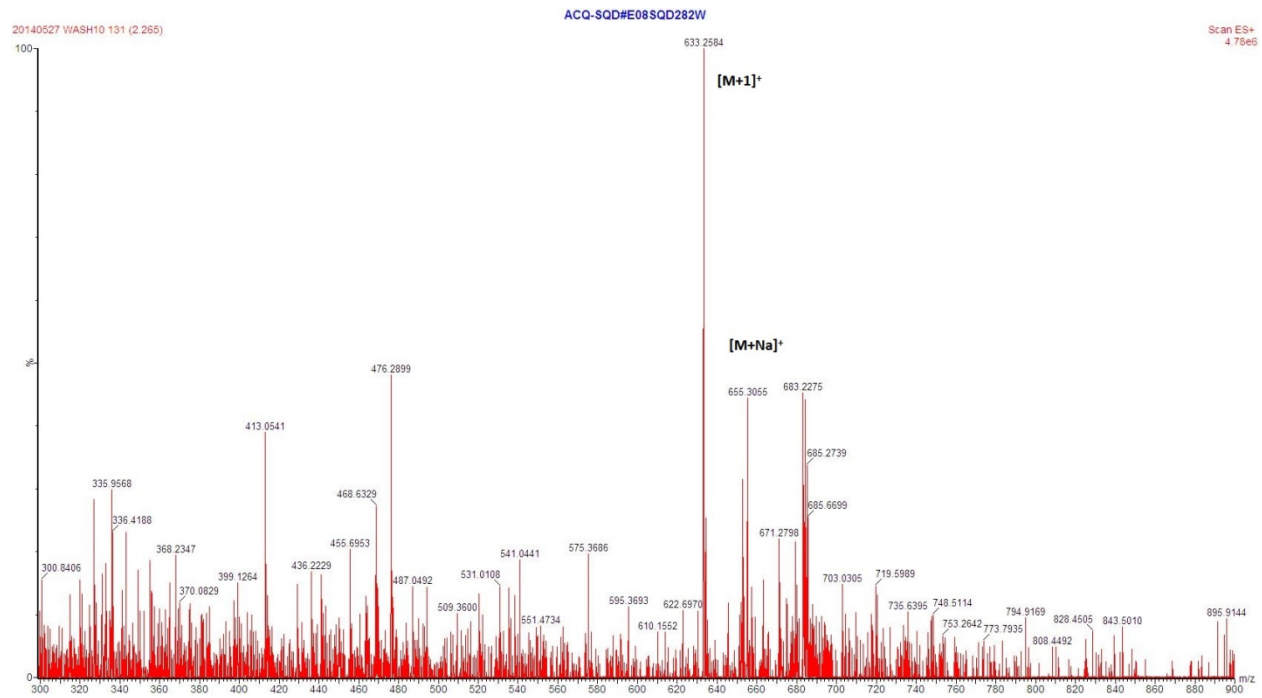

Figure S4. ESI-MS spectrum of P1.

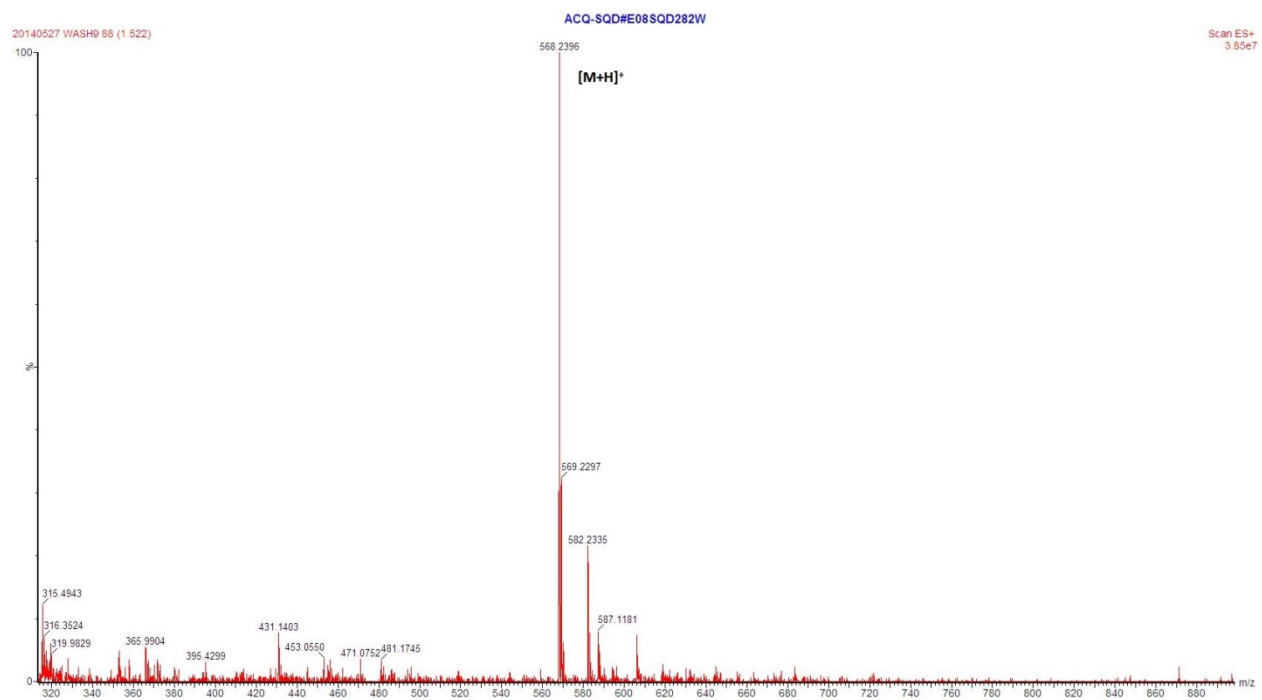

Figure S5. ESI-MS spectrum of P2.

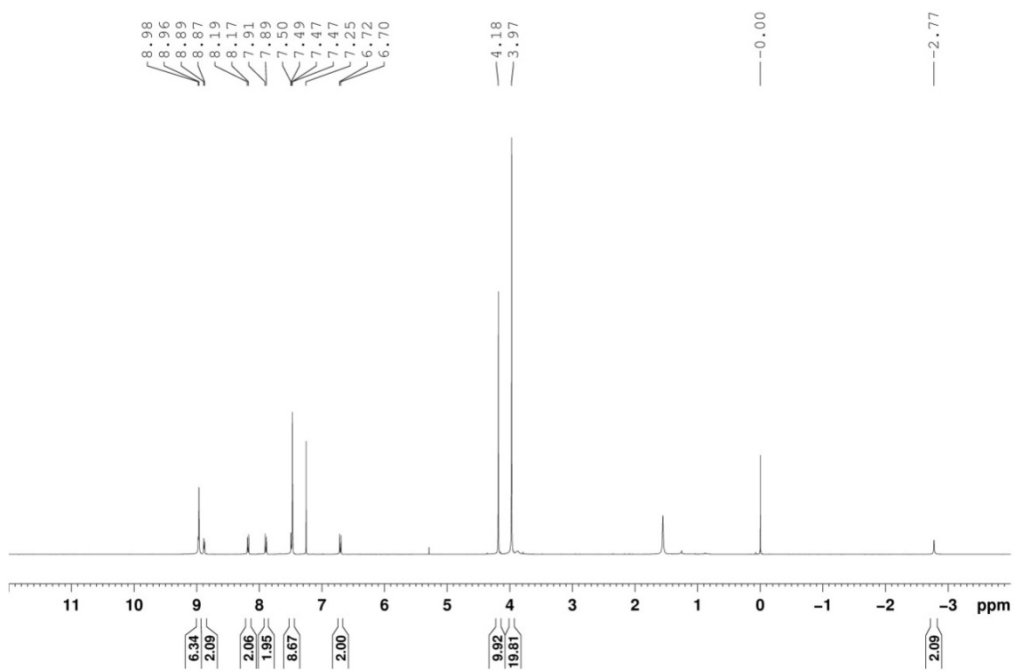

**FigureS6.**  $^1\text{H-NMR}$  spectrum of Por- $\text{NH}_2$

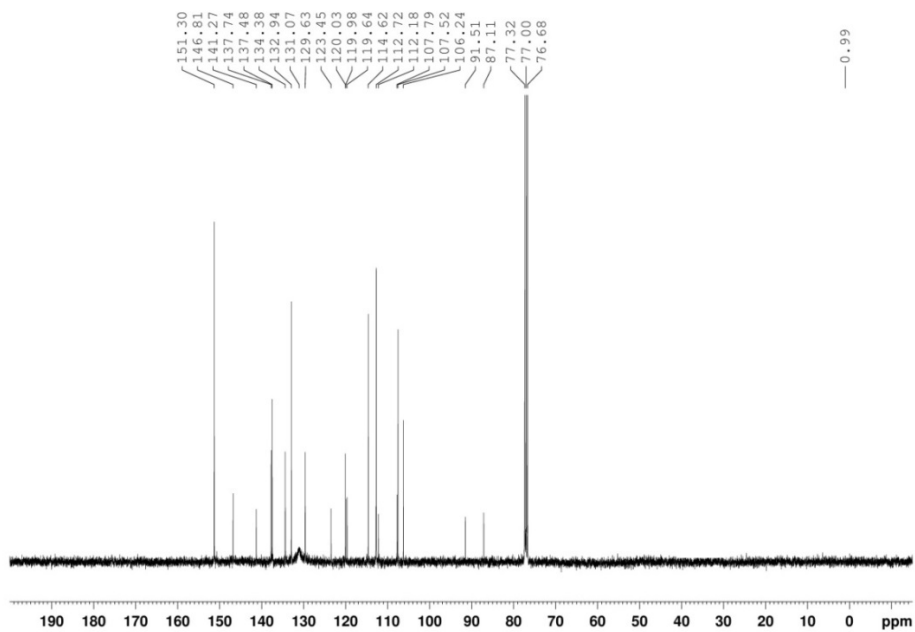

**FigureS7.**  $^{13}\text{C-NMR}$  spectrum of Por- $\text{NH}_2$

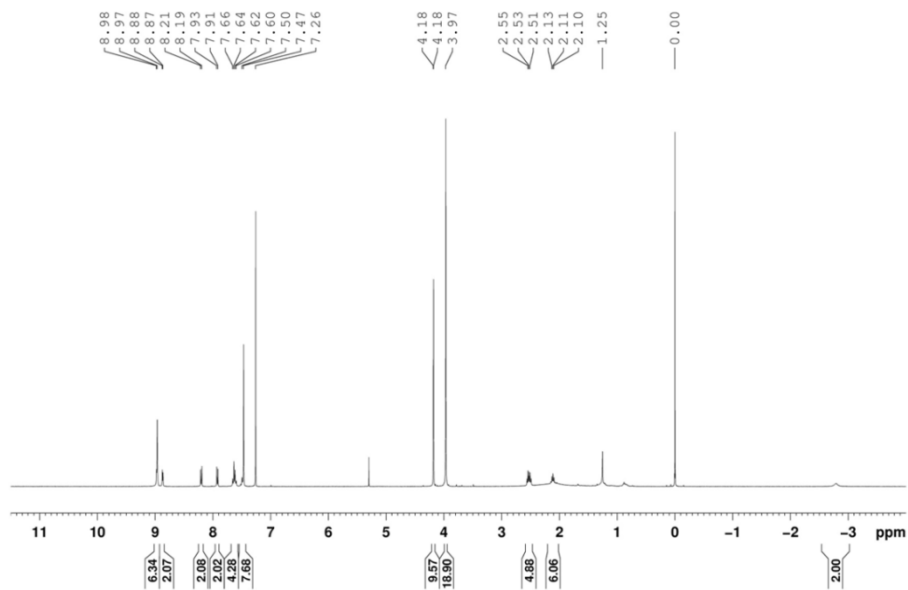

**FigureS8.**  $^1\text{H}$ -NMR spectrum of Por-COOH.

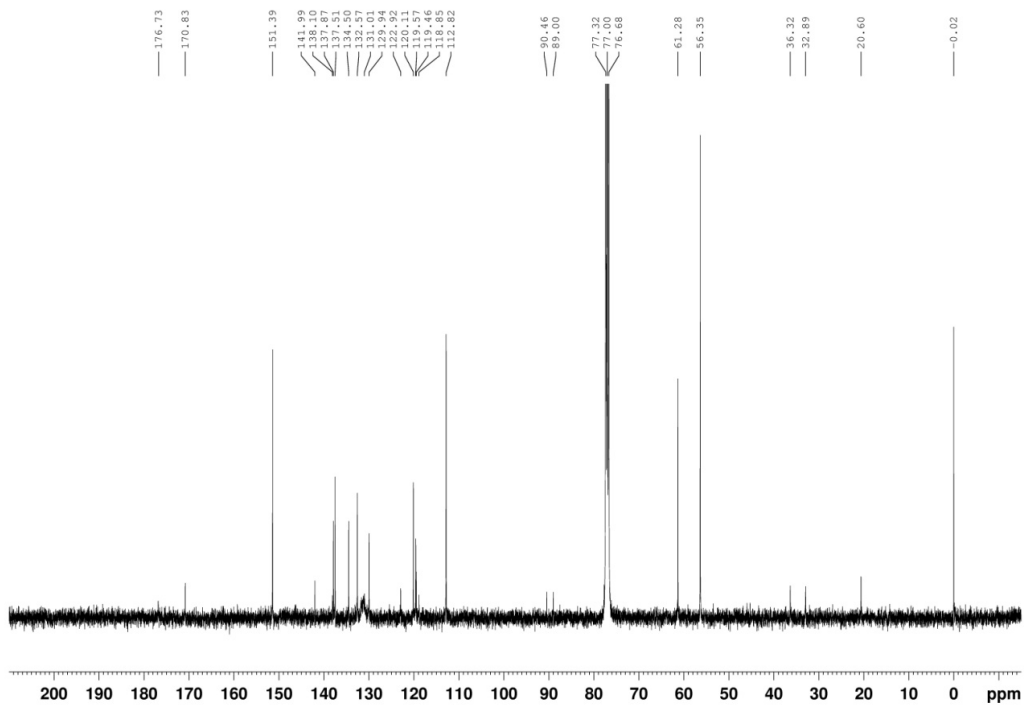

**FigureS9.**  $^{13}\text{C}$ -NMR spectrum of Por-COOH.

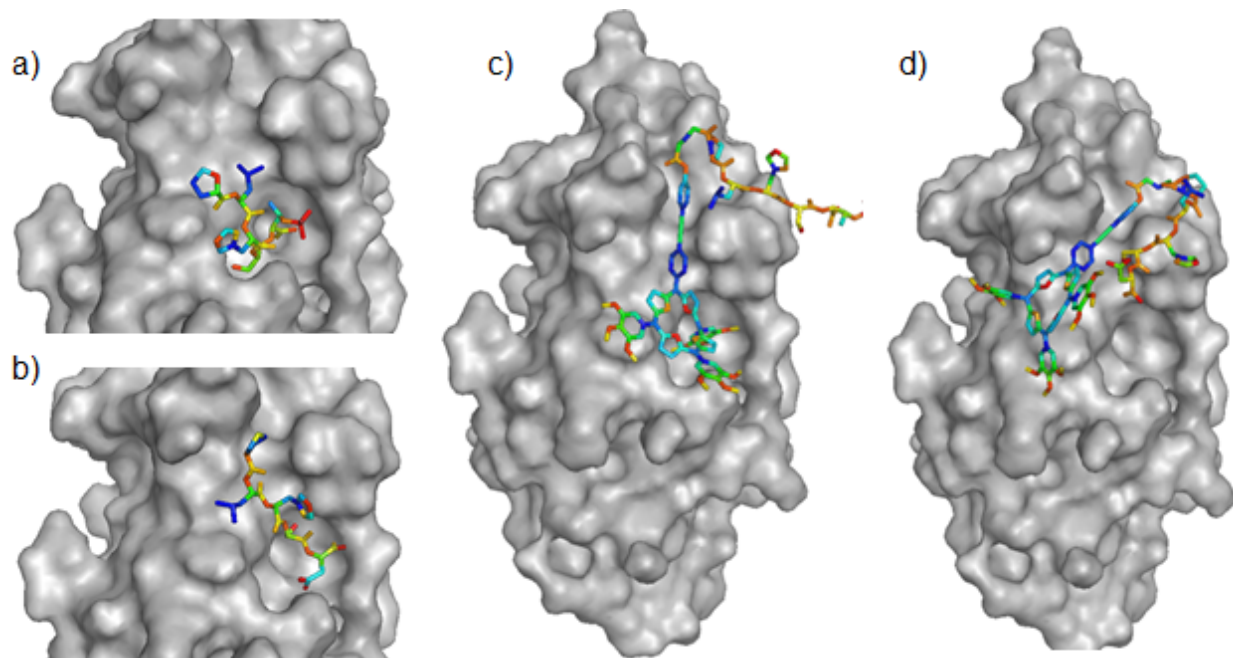

**Figure S10.** The binding fitting via molecular modeling for the comparisons of interactions between (a) P1, (b) P2, (c) Por-P1, (d) Por-P2 and Plk1 structure.

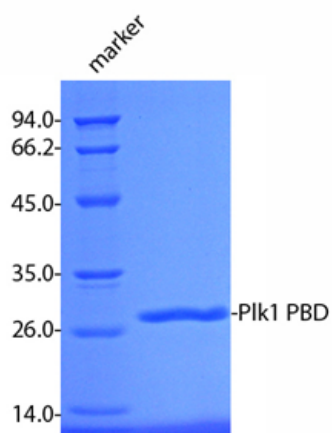

**Figure S11.** Purified Plk1 (PBD domain) in protein gel stained with coomassie blue.

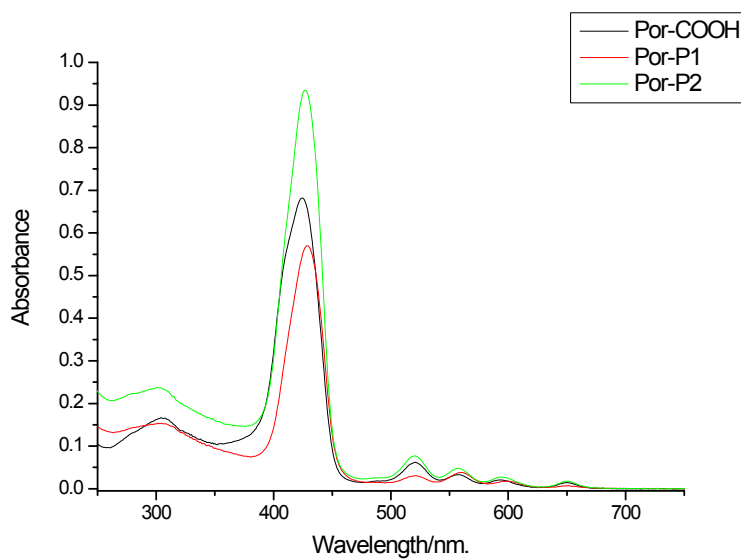

**Figure S12.** The UV absorption spectra of Por-COOH, Por-P1 and Por-P2 ( $10^{-5}$ M) in HEPES buffer (10 mM HEPES, pH=8.0, 150 mM NaCl).

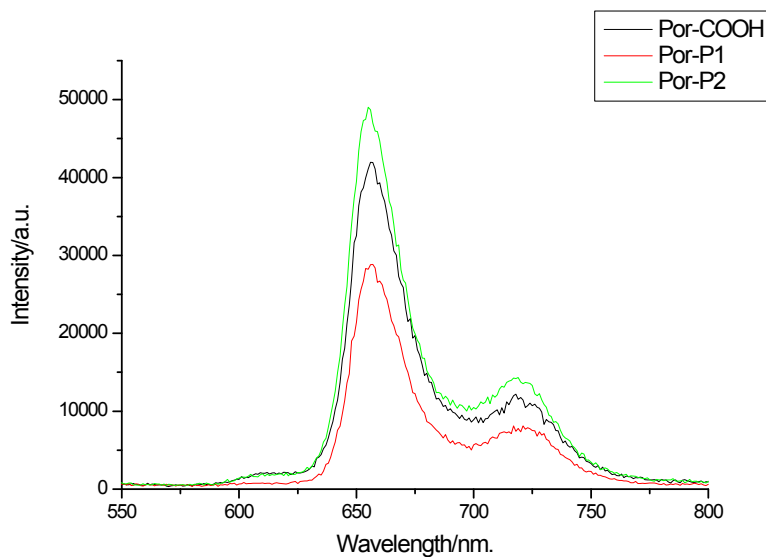

**Figure S13.** The emission spectra of Por-COOH, Por-P1 and Por-P2 in HEPES buffer. ( $\lambda_{\text{ex}} = 430$  nm and  $10^{-6}$ M)

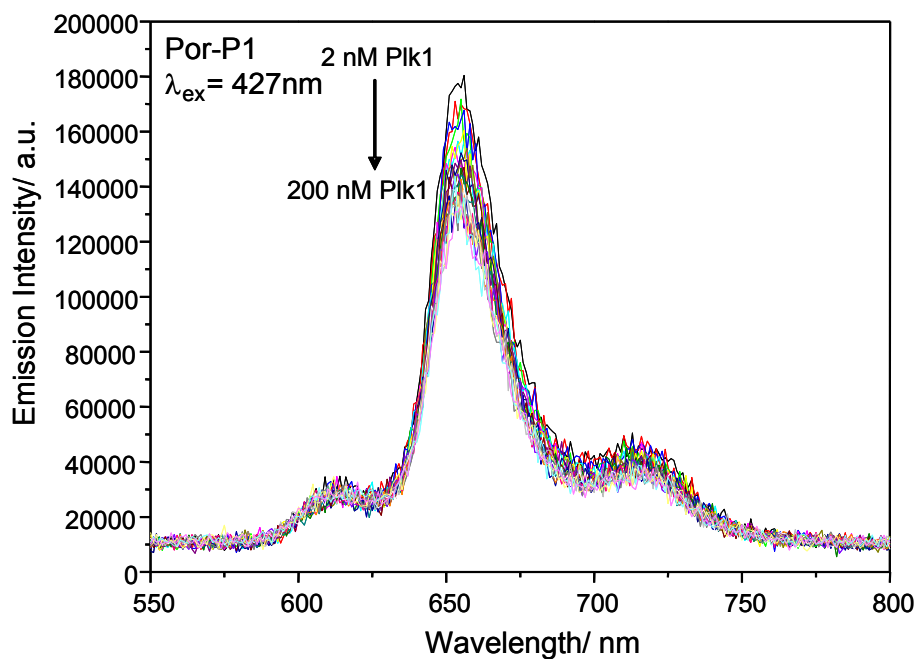

**Figure S14.** The emission titration of Por-P1 (1  $\mu\text{M}$ ) upon addition of Plk1 (2 nM - 200 nM) in HEPES buffer. ( $\lambda_{\text{ex}} = 427 \text{ nm}$ )

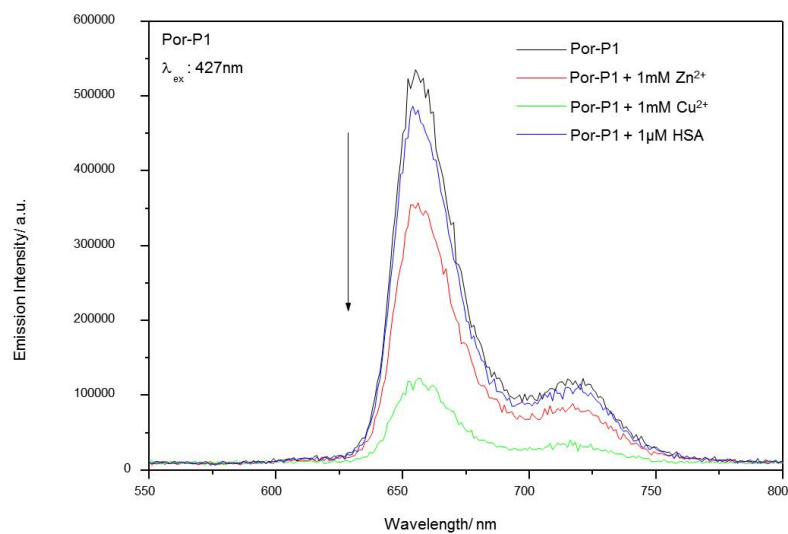

**Figure S15.** The emission change of Por-P1 (1  $\mu\text{M}$ ) upon addition of  $\text{Zn}^{2+}$ ,  $\text{Cu}^{2+}$  and HSA in HEPES. ( $\lambda_{\text{ex}} = 427 \text{ nm}$ )



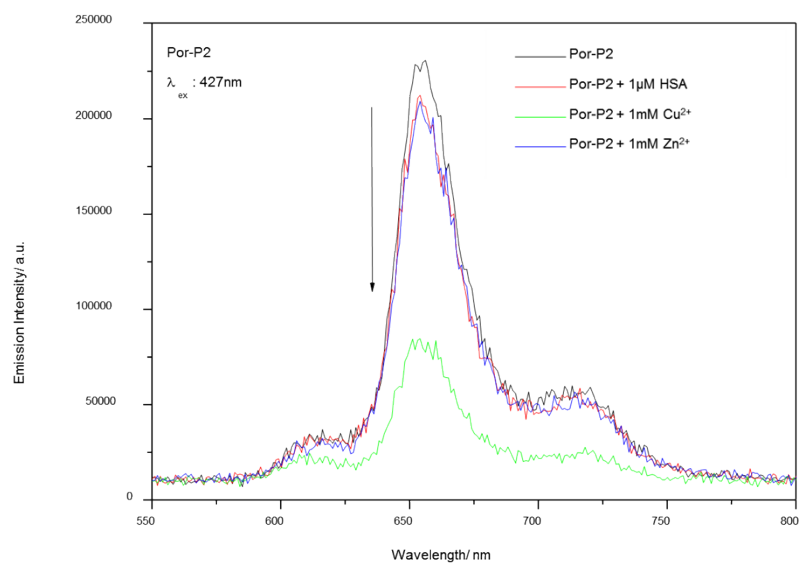

**Figure S16.** The emission change of Por-P2 (1  $\mu\text{M}$ ) upon addition of  $\text{Zn}^{2+}$ ,  $\text{Cu}^{2+}$  and HSA in HEPES buffer. ( $\lambda_{\text{ex}} = 427 \text{ nm}$ )

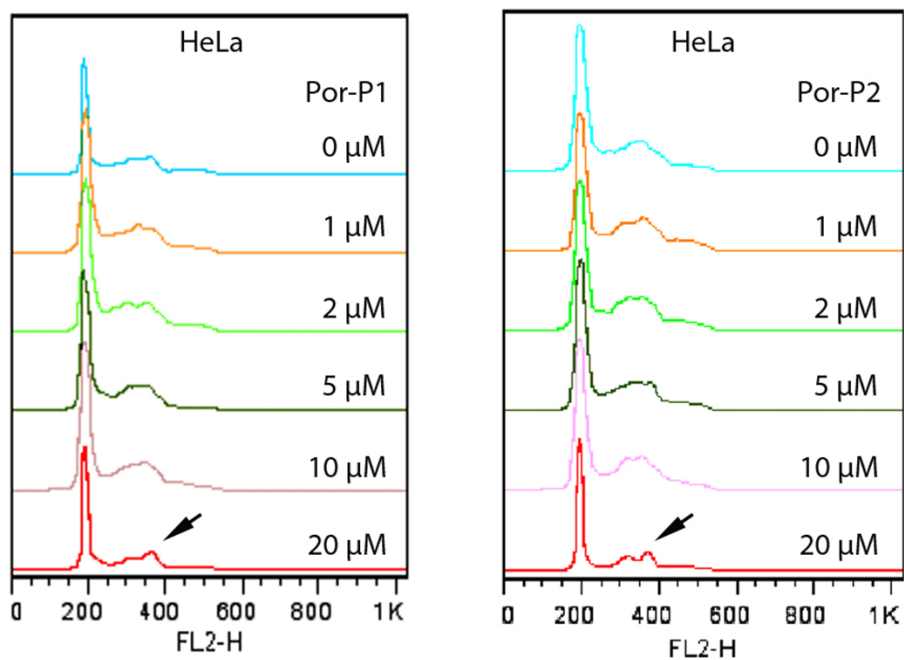

**Figure S17.** Representative Half-Offset histograms of HeLa cells analyzed by Flow cytometry after treated with Por-Pn. Figures were processed by using FlowJo 7.6.1. Por-P1 or Por-P2 cause the HeLa cells arrested in G2/M phase in a concentration-dependent manner, with an obvious G2/M peak in the concentration of 20  $\mu\text{M}$ .

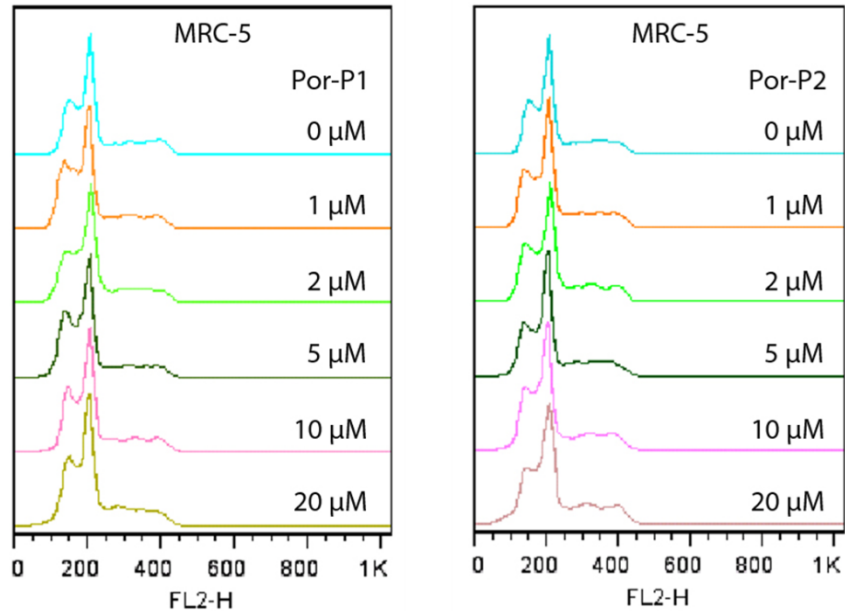

**Figure S18.** Raw data of MRC-5 cells analyzed using Flow cytometry and presented by Half-Offset histograms from FlowJo 7.6.1. Parallel performed as in **Figure S17**.

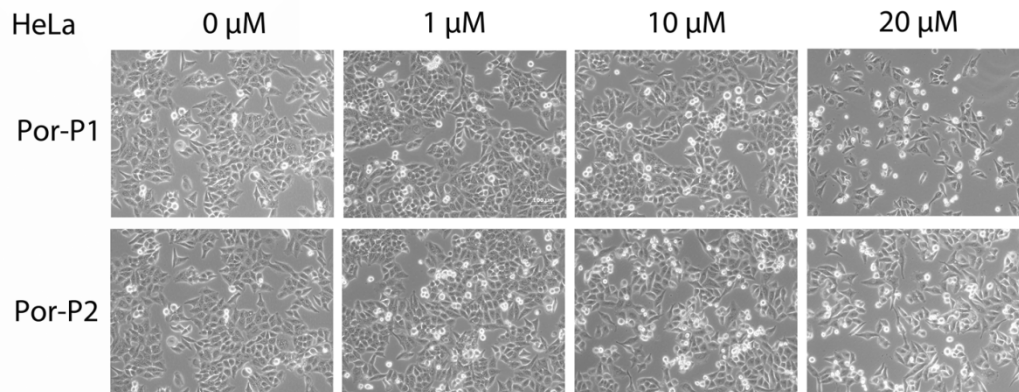

**Figure S19.** Por-P1 and Por-P2 treatments had induced Plk1 inhibition and succeeding G2/M arrest of HeLa cells. Experimentally, HeLa cells were microscopically imaged by Zeiss Axio Observer A1 (10  $\times$ ). Upon 10 or 20  $\mu\text{M}$  of Por-Pn treatments, parts of cells showed mitotic arrested, and cell growth was inhibited.

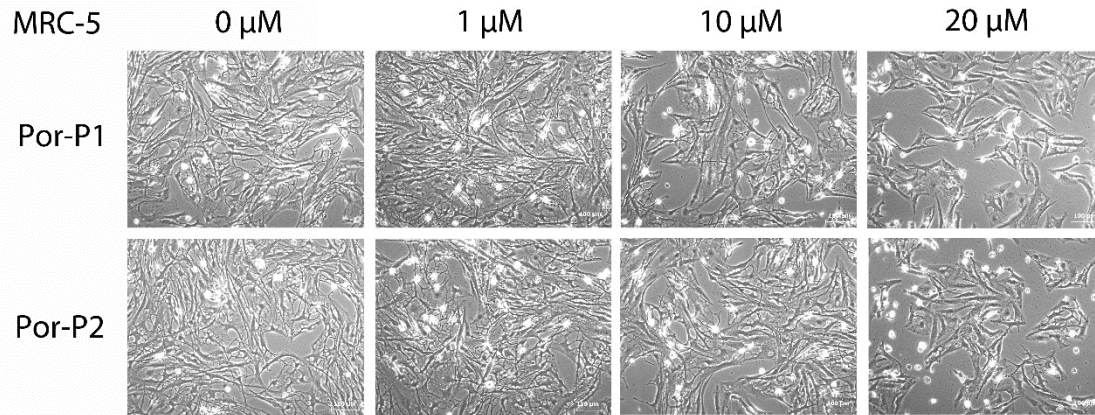

**Figure S20.** Human normal lung fibroblasts MRC-5 cells were treated with Por-P1 and Por-P2 and then microscopically imaged. No obvious effects were detected under Por-Pn treatments on the MRC-5 cells.
